# Supplementary material for: Long noncoding RNA LINC02582 acts downstream of miR-200c to promote radioresistance through CHK1 in breast cancer cells
Source: PubMed Central journal article supplement (PMC6787210; doi:10.1038/s41419-019-1996-0), 2019-10-10

# Supplementary Figure 4

**a**

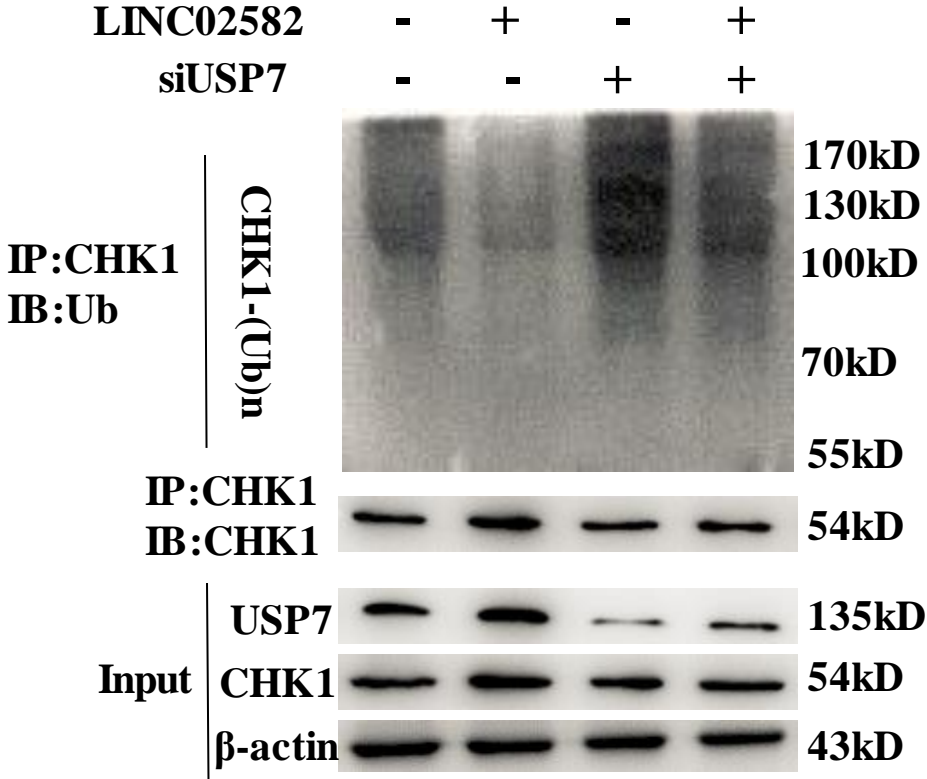

Supplement: 41419_2019_1996_MOESM4_ESM.pdf [file 41419_2019_1996_MOESM4_ESM.pdf]
