# Supplementary material for: Long noncoding RNA LINC02582 acts downstream of miR-200c to promote radioresistance through CHK1 in breast cancer cells
Source: PubMed Central journal article supplement (PMC6787210; doi:10.1038/s41419-019-1996-0), 2019-10-10
Supplement: 41419_2019_1996_MOESM6_ESM.pdf [file 41419_2019_1996_MOESM6_ESM.pdf]

**Supplementary Table 1.** Target lncRNAs for has-miR-200c-3p

| Target         |               | Sites      |            | TargetScan |          | miRanda |           | Annotations |           |            |          |         |       |        |
|----------------|---------------|------------|------------|------------|----------|---------|-----------|-------------|-----------|------------|----------|---------|-------|--------|
| Seqname        | GeneSymbol    | Fold chang | Regulation | Total      | Context+ | Context | Structure | Energy      | Site_type | site_start | site_end | TR Leng | chrom | strand |
| ENST0000058394 | CTD-2354A18.  | 30.38      | down       | 1          | -0.138   | -0.249  | 142       | -11.37      | 7mer-m8   | 616        | 638      | 847     | chr18 | +      |
| NR_038340      | LINC02582     | 19.78      | down       | 1          | -0.106   | -0.229  | 142       | -11.37      | 7mer-m8   | 419        | 441      | 1181    | chr18 | +      |
| ENST0000042107 | RP11-69C17.3  | 9.39       | down       | 1          | -0.212   | -0.389  | 164       | -19.58      | 7mer-m8   | 381        | 405      | 2321    | chr10 | +      |
| NR_023390      | LINC00476     | 9.22       | down       | 1          | -0.087   | -0.186  | 155       | -18.33      | 7mer-m8   | 7862       | 7883     | 8030    | chr9  | -      |
| TCONS_00011821 | XLOC_005303   | 7.77       | down       | 1          | -0.161   | -0.296  | 150       | -13.75      | 7mer-m8   | 290        | 315      | 597     | chr6  | +      |
| ENST0000056510 | RP11-65L3.1   | 6.13       | down       | 1          | -0.014   | 0.003   | 147       | -19.37      | 7mer-m8   | 41         | 61       | 2058    | chr2  | +      |
| ENST0000053170 | C6orf3        | 4.62       | down       | 1          | -0.057   | -0.159  | 140       | -8.82       | 7mer-m8   | 344        | 366      | 2421    | chr6  | +      |
| ENST0000041983 | RP11-332K15.1 | 4.53       | down       | 1          | -0.222   | -0.415  | 140       | -10.59      | 8mer-1a   | 18         | 40       | 451     | chr7  | +      |
| ENST0000047465 | RP4-545C24.1  | 4.48       | down       | 1          | -0.011   | -0.05   | 143       | -14.77      | 7mer-m8   | 571        | 592      | 773     | chr7  | +      |
| ENST0000045080 | RP11-27I1.2   | 4.24       | down       | 1          | -0.054   | -0.149  | 145       | -12.91      | 7mer-m8   | 228        | 250      | 912     | chr9  | +      |
| ENST0000056369 | CTD-3105H18.  | 4.15       | down       | 2          | -0.019   | -0.07   | 281       | -36.39      | 7mer-1a   | 809        | 835      | 1980    | chr19 | -      |
| ENST0000056150 | RP11-1024P17. | 4.10       | down       | 1          | -0.128   | -0.238  | 147       | -12.49      | 7mer-m8   | 101        | 121      | 1916    | chr3  | +      |
| ENST0000027044 | ZNF702P       | 4.04       | down       | 2          | -0.282   | -0.568  | 299       | -26.11      | 7mer-m8   | 2633       | 2655     | 2990    | chr19 | -      |
| ENST0000045694 | RP11-82L18.2  | 3.73       | down       | 1          | -0.191   | -0.344  | 153       | -17.02      | 7mer-m8   | 105        | 127      | 583     | chr9  | -      |
| uc003znh.1     | BX648501      | 3.67       | down       | 1          | -0.094   | -0.249  | 150       | -10.54      | 7mer-m8   | 700        | 720      | 2421    | chr9  | +      |
| ENST0000043264 | RP11-27I1.2   | 3.66       | down       | 1          | -0.046   | -0.144  | 145       | -12.91      | 7mer-m8   | 284        | 306      | 719     | chr9  | +      |
| NR_024539      | POPDC3        | 3.58       | down       | 1          | -0.082   | -0.214  | 162       | -17.54      | 7mer-m8   | 400        | 420      | 1389    | chr6  | -      |
| TCONS_00003741 | XLOC_001546   | 3.52       | down       | 1          | -0.072   | -0.165  | 149       | -14.86      | 7mer-m8   | 272        | 294      | 464     | chr2  | +      |
| uc003kkc.2     | FLJ42709      | 3.46       | down       | 1          | -0.109   | -0.287  | 153       | -8.98       | 7mer-m8   | 1710       | 1730     | 2562    | chr5  | -      |
| NR_046269      | SSBP1         | 3.27       | down       | 1          | -0.015   | -0.103  | 144       | -9.33       | 7mer-m8   | 426        | 453      | 764     | chr7  | +      |
| ENST0000056892 | RP11-16P6.1   | 3.27       | down       | 1          | -0.013   | -0.073  | 140       | -9.6        | 7mer-1a   | 185        | 208      | 2815    | chr2  | -      |
| ENST0000050749 | RP11-94H18.1  | 3.16       | down       | 1          | -0.179   | -0.301  | 149       | -10.49      | 7mer-m8   | 1811       | 1832     | 1867    | chr8  | -      |
| ENST0000055425 | RP11-618G20.2 | 3.02       | down       | 1          | -0.072   | -0.168  | 152       | -17.27      | 7mer-m8   | 326        | 386      | 533     | chr14 | -      |
| ENST0000054789 | RP11-328C8.5  | 3.02       | down       | 1          | -0.2     | -0.378  | 149       | -15.49      | 8mer-1a   | 198        | 218      | 447     | chr12 | -      |
| uc001vmm.3     | AK094990      | 2.94       | down       | 2          | -0.073   | -0.396  | 288       | -26.8       | 7mer-m8   | 2133       | 2157     | 3106    | chr13 | -      |
| NR_028131      | CFL2          | 2.90       | down       | 1          | -0.082   | -0.362  | 144       | -11.86      | 8mer-1a   | 897        | 919      | 3013    | chr14 | -      |
| TCONS_00005961 | XLOC_002602   | 2.85       | down       | 1          | -0.056   | -0.159  | 140       | -10.59      | 7mer-m8   | 592        | 614      | 997     | chr3  | +      |
| NR_028130      | CFL2          | 2.84       | down       | 1          | -0.054   | -0.343  | 144       | -11.86      | 8mer-1a   | 1008       | 1030     | 3124    | chr14 | -      |
| ENST0000056903 | RP11-15N24.4  | 2.83       | down       | 1          | -0.071   | -0.165  | 147       | -12.82      | 7mer-m8   | 2019       | 2039     | 2164    | chr3  | +      |
| NR_033810      | CYP3A5        | 2.82       | down       | 1          | -0.03    | -0.212  | 148       | -12.67      | 7mer-m8   | 1623       | 1646     | 2859    | chr7  | -      |
| ENST0000056900 | RP11-434B12.1 | 2.75       | down       | 2          | -0.464   | -0.878  | 301       | -31.3       | 7mer-m8   | 598        | 621      | 1553    | chr2  | -      |
| ENST0000048442 | PLGLA         | 2.74       | down       | 1          | -0.048   | -0.141  | 145       | -10.44      | 7mer-m8   | 441        | 463      | 700     | chr2  | +      |
| TCONS_00009811 | XLOC_005086   | 2.71       | down       | 1          | -0.085   | -0.168  | 140       | -14.85      | 7mer-m8   | 46         | 68       | 1008    | chr5  | -      |

| Seqname        | Target        | Fold chang | Regulation | Sites | TargetScan |         | miRanda   |        |           | Annotations |          |      |        |       |
|----------------|---------------|------------|------------|-------|------------|---------|-----------|--------|-----------|-------------|----------|------|--------|-------|
|                | GeneSymbol    |            |            | Total | Context+   | Context | Structure | Energy | Site_type | site_start  | site_end | TR   | Length | chrom |
| ENST0000044789 | RP11-271I.2   | 2.64       | down       | 2     | -0.062     | -0.282  | 302       | -25.73 | 7mer-m8   | 429         | 451      | 3519 | chr9   | +     |
| NR_038970      | LINC00641     | 2.63       | down       | 1     | -0.157     | -0.289  | 143       | -12.13 | 7mer-m8   | 5123        | 5144     | 5439 | chr8   | -     |
| NR_027942      | COX11         | 2.58       | down       | 2     | -0.077     | -0.282  | 298       | -31.99 | 7mer-m8   | 669         | 692      | 1124 | chr17  | -     |
| NR_038971      | LINC00641     | 2.57       | down       | 1     | -0.157     | -0.289  | 143       | -12.13 | 7mer-m8   | 1843        | 1864     | 2159 | chr14  | -     |
| uc003kkf.2     | FLJ42709      | 2.54       | down       | 1     | -0.109     | -0.287  | 153       | -8.98  | 7mer-m8   | 1940        | 1960     | 2792 | chr5   | -     |
| NR_027941      | COX11         | 2.52       | down       | 2     | -0.077     | -0.283  | 298       | -31.99 | 7mer-m8   | 807         | 829      | 1138 | chr17  | -     |
| uc001aze.3     | CROCCP2       | 2.48       | down       | 1     | -0.125     | -0.27   | 159       | -17.61 | 7mer-m8   | 1754        | 1778     | 2175 | chr1   | -     |
| ENST0000044499 | MCM3AP-AS1    | 2.46       | down       | 1     | -0.007     | -0.15   | 153       | -11.93 | 7mer-m8   | 1323        | 1344     | 2193 | chr21  | +     |
| ENST0000043212 | RP11-119K6.6  | 2.42       | down       | 1     | -0.125     | -0.244  | 155       | -13.31 | 7mer-m8   | 73          | 94       | 645  | chr10  | +     |
| ENST0000045205 | AC007038.7    | 2.39       | down       | 1     | -0.018     | -0.137  | 140       | -11.01 | 7mer-m8   | 1502        | 1524     | 2199 | chr2   | +     |
| ENST0000057137 | RP11-199F11.2 | 2.38       | down       | 1     | -0.174     | -0.293  | 148       | -10.96 | 7mer-m8   | 985         | 1008     | 1112 | chr17  | -     |
| ENST0000053038 | CTD-3012A18.  | 2.31       | down       | 1     | -0.079     | -0.177  | 156       | -17.56 | 7mer-m8   | 39          | 59       | 563  | chr11  | +     |
| uc002the.2     | LOC541471     | 2.31       | down       | 1     | -0.112     | -0.269  | 158       | -13.68 | 7mer-m8   | 978         | 999      | 1583 | chr2   | -     |
| TCONS_0002654  | XLOC_012861   | 2.29       | down       | 1     | -0.08      | -0.172  | 144       | -12.74 | 7mer-m8   | 62          | 87       | 436  | chr18  | -     |
| ENST0000046461 | SNHG12        | 2.25       | down       | 1     | -0.036     | -0.129  | 145       | -10.71 | 7mer-m8   | 248         | 270      | 719  | chr1   | -     |
| NR_036553      | FASTKD3       | 2.24       | down       | 1     | -0.272     | -0.465  | 145       | -15.17 | 8mer-1a   | 645         | 669      | 900  | chr5   | -     |
| uc001uxg.3     | AK021977      | 2.22       | down       | 1     | -0.049     | -0.157  | 145       | -9.97  | 7mer-m8   | 396         | 418      | 7545 | chr13  | -     |
| NR_028138      | LOC338758     | 2.19       | down       | 1     | -0.152     | -0.266  | 143       | -11.54 | 7mer-m8   | 2875        | 2897     | 2998 | chr12  | +     |
| TCONS_0001986  | XLOC_009079   | 2.16       | down       | 1     | -0.049     | -0.137  | 141       | -16.18 | 7mer-m8   | 30          | 52       | 788  | chr11  | +     |
| ENST0000050315 | CTD-2201E18.: | 2.15       | down       | 1     | -0.033     | -0.127  | 154       | -22.94 | 7mer-m8   | 164         | 187      | 608  | chr5   | -     |
| uc011cue.1     | FLJ42709      | 2.12       | down       | 1     | -0.109     | -0.287  | 153       | -8.98  | 7mer-m8   | 1965        | 1985     | 2817 | chr5   | -     |
| NR_036434      | RSRC2         | 2.07       | down       | 1     | -0.154     | -0.275  | 141       | -15.03 | 7mer-m8   | 2237        | 2259     | 2430 | chr12  | -     |
| uc003kkg.2     | FLJ42709      | 2.06       | down       | 1     | -0.109     | -0.287  | 153       | -8.98  | 7mer-m8   | 1780        | 1800     | 2632 | chr5   | -     |
| ENST0000056533 | RP4-561L24.3  | 2.03       | down       | 1     | -0.079     | -0.178  | 151       | -13.78 | 7mer-m8   | 1573        | 1594     | 1766 | chr1   | +     |
| ENST0000056841 | AC137934.1    | 2.01       | down       | 1     | -0.001     | -0.11   | 140       | -12.44 | 7mer-m8   | 1420        | 1442     | 2056 | chr16  | +     |
