# Supplementary material for: Long noncoding RNA LINC02582 acts downstream of miR-200c to promote radioresistance through CHK1 in breast cancer cells
Source: PubMed Central journal article supplement (PMC6787210; doi:10.1038/s41419-019-1996-0), 2019-10-10
Supplement: 41419_2019_1996_MOESM7_ESM.pdf [file 41419_2019_1996_MOESM7_ESM.pdf]

**Supplementary Table 2.** Analysis results of *LINC02582* sequences by Open

Reading Frame Finder Finder from NCBI

**1、** Sequences of *LINC02582*

GCTGACTCTCTTTTCGGACTCAGCCCGCCTGCACCCAGGTGAAATAAACTGCCATGTTGCT  
 CACTAAGCCTGTTTGGTGGTCTCTTCACAGGGACACGGATGAAATTTTCGTGCCGTGACT  
 CGGATCGGAGAACCTCCCTTAGGAGATCAATCCCCTGTACTCCTTTTCTTTACCCTGTGAG  
 AAAGATCCACCTATTACCTCAGGTCCTCAGACCGACCAGCCCAAGGAACATCTACCAATT  
 TAAATGAGACCTTGAAGATTGTTGTTCAAGGAGAACTGAAGACCAAGAAGGAAAGTC  
 AGAGCCAGCAATACCAGCAGAGCCAGATCTGAGCTGGGAGAAGCCGAGAAAGTTTGTGA  
 ACAGGAGATCGGTGACCTGGGCTCCTTATGTGCCTGAAAGAGTTTGAGTTTCTGTAACT  
 CCAAATCAACAGTATTTTCAACAAGAAATGTGCAATTGAAATCAAGTGCTGTTAAGTACA  
 GCTTGATTTCCCCAGGAAGACACTTGCAGTGAACAGAGTTATGGAGCAGCAAAAAACA  
 GATCTATTTGGAATTAGAGATAAGATATGCGTTGTATTTTTCGTCATATATAATACCATCT  
 CTCAAAGGTGGTTCTAAATTACAAAGGACTTTGATTTCTAGGTAGATTCTGGGTAGAGACT  
 TCCTTTCTTATGAGGCATTAATGACACCGTTAACCTGTGACGCAATATGACTGGAGTTGT  
 ACTTTGAGAAGATTAATCAGGTTTGGTTGCAGAATGAAAGAGAAGATGAAGTCAAGAGAT  
 TGGTTTAGAGGCTCTAGCAGAAGCTTAGTCATATTTCAAAATGATCAAATGTCAAGAAATAT  
 TCTGAGCTGCATAACTTGATAAAGTAATTTTCAGTGATTTCTTTCATGGTTATGATAAAGA  
 ACTGGATTCGCAGAAACTTTTACCCTGAATCAAGATTAATTTTCTTTGAGCTCATCTTAA  
 GGATATCGGAACATAGGGAGCAAACGATGGTGTGGCTGCCTCAGTGCTTGATTTTAAACGG  
 TTTTGAAGAGATTAGTTACATTTCTTCTCCTAGTAAGAATAATAAATACTTAAACAGAAAT  
 GAATTCCTATTTCTTTGTACTGGTCTATGTCTTCAAACATTAATACTATTGATAAGAT  
 ATCACCTTTTAAAAA

**2、** The Open Reading Frame of *LINC02582*

Mark subset...    Marked: 0     as  ▼

| Label ▲     | Strand   | Frame    | Start      | Stop       | Length (nt   aa) |
|-------------|----------|----------|------------|------------|------------------|
| <b>ORF1</b> | <b>+</b> | <b>1</b> | <b>196</b> | <b>336</b> | <b>141   46</b>  |
| ORF2        | +        | 1        | 391        | 480        | 90   29          |
| ORF3        | +        | 1        | 766        | 882        | 117   38         |
| ORF4        | +        | 3        | 54         | 182        | 129   42         |
| ORF5        | +        | 3        | 1101       | >1181      | 81   26          |
| ORF6        | -        | 1        | 824        | 702        | 123   40         |
| ORF7        | -        | 1        | 689        | 549        | 141   46         |
| ORF8        | -        | 2        | 571        | 419        | 153   50         |
| ORF9        | -        | 3        | 1092       | 976        | 117   38         |

---

### 3、The predicted protein results of *LINC02582* Open Reading Frame

---

>**lcl|ORF1**:196:336 unnamed protein product  
MTSGPQTDQPKEHLTNFKSDLEDLLFKEKLKSKKESESQQYQQSQI

>**lcl|ORF2**:391:480 unnamed protein product  
MCLKEFEFPVNSKSTVFSTRNVQLKSSAV

>**lcl|ORF3**:766:882 unnamed protein product  
MKEKMKS RDWFRGSSRSLVIFQNDQISRKILSCITCIK

>**lcl|ORF4**:54:182 unnamed protein product  
MLLTQSLFGGLFTGTRMKFGAVTRIGEPPLGDQSPVLLFFAL

>**lcl|ORF5**:1101:1181 unnamed protein product, partial  
MNSLSLCTLVYFFKTLNTIDKISPFKK

>**lcl|ORF6**:824:702 unnamed protein product  
MTKLLLEPLNQSLDFIFSFILQPNLINLLKVQLQSYCFPG

>**lcl|ORF7**:689:549 unnamed protein product  
MPQYERKSLPRIYLEIKVLCNLEPPLRGWYFIIIEAKYNA YVFSFSK

>**lcl|ORF8**:571:419 unnamed protein product  
MFSLFPNRSVLLLHNSVHCKCLPVEILAALKQHLISIAHFLLKILLIWS

>**lcl|ORF9**:1092:976 unnamed protein product  
MYLLVLTRRRNV TILFKTVKNQALRQPHHRLLP MFRYP

---
