# Supplementary material for: Long noncoding RNA LINC02582 acts downstream of miR-200c to promote radioresistance through CHK1 in breast cancer cells
Source: PubMed Central journal article supplement (PMC6787210; doi:10.1038/s41419-019-1996-0), 2019-10-10
Supplement: 41419_2019_1996_MOESM8_ESM.pdf [file 41419_2019_1996_MOESM8_ESM.pdf]

**Supplementary Table 3.** Mass spectrometry Analysis of the Proteins Pull Down by*LINC02582*

| Rank | Name and Official Symbol                                 | Scores | Protein Mass | No of Peptide | Relative Abundance |
|------|----------------------------------------------------------|--------|--------------|---------------|--------------------|
| 1    | Ubiquitin specific peptidase 7<br>OS=Homo sapiens        | 647    | 174622       | 22            | 40.19%             |
| 2    | Alpha-2-macroglobulin<br>OS=Homo sapiens                 | 334    | 164613       | 22            | 21.42%             |
| 3    | Serum albumin<br>OS=Homo sapiens                         | 252    | 164613       | 19            | 20.62%             |
| 4    | Hemopexin<br>OS=Homo sapiens                             | 74     | 52385        | 10            | 13.01%             |
| 5    | Hemoglobin subunit beta<br>OS=Homo sapiens               | 51     | 16102        | 5             | 8.21%              |
| 6    | Actin, cytoplasmic 1<br>OS=Homo sapiens                  | 36     | 42052        | 5             | 7.96%              |
| 7    | MAP kinase-activated protein<br>kinase 3 OS=Homo sapiens | 31     | 37822        | 5             | 7.2%               |
| 8    | Ig lambda-6 chain C region<br>OS=Homo sapiens            | 19     | 11441        | 2             | 5.23%              |
| 9    | Apolipoprotein E<br>OS=Homo sapiens                      | 18     | 30733        | 2             | 4.24%              |
| 10   | Uromodulin OS=Homo sapiens                               | 18     | 7350         | 1             | 3.45%              |
