# Supplementary material for: Long noncoding RNA LINC02582 acts downstream of miR-200c to promote radioresistance through CHK1 in breast cancer cells
Source: PubMed Central journal article supplement (PMC6787210; doi:10.1038/s41419-019-1996-0), 2019-10-10
Supplement: 41419_2019_1996_MOESM10_ESM.pdf [file 41419_2019_1996_MOESM10_ESM.pdf]

**Supplementary Table 5.** SiRNA and shRNA sequence used in this study

| Genes              | Sequence                      |
|--------------------|-------------------------------|
| LINC02582 siRNA1   | 5'-GAAAUCAAGUGCUGUUUAAdTdT-3' |
| LINC02582 siRNA2   | 5'-GCAGAAGCUUAGUCAUAUUdTdT-3' |
| LINC02582 siRNA3   | 5'-CAAUAUGACUGGAGUUGUAdTdT-3' |
| USP7 siRNA         | 5'-GGCAACCUUCAGUUCACUdTdT-3'  |
| CHK1 siRNA         | 5'-GGAGAGAAGGCAAUAUCCAdTdT-3' |
| miR-200c inhibitor | 5'-UCCAUCAUUACCCGGCAGUAUUA-3' |
| LINC02582 shRNA    | 5'-GAAAUCAAGUGCUGUUUAA-3'     |
