# Supplementary material for: Long noncoding RNA LINC02582 acts downstream of miR-200c to promote radioresistance through CHK1 in breast cancer cells
Source: PubMed Central journal article supplement (PMC6787210; doi:10.1038/s41419-019-1996-0), 2019-10-10
Supplement: 41419_2019_1996_MOESM11_ESM.pdf [file 41419_2019_1996_MOESM11_ESM.pdf]

**Supplementary Table 6.** Primer Sequence used in this study

| Gene          | Sequence (5'-3')                          |
|---------------|-------------------------------------------|
| miR-200c-F    | ACACTCCAGCTGGGCGTCTTACCCAGCAGT            |
| miR-200c-R    | TGGTGTCGTGGAGTCG                          |
| miR-200c-RT   | CTCAACTGGTGTCTGGAGTCGGCAATTCAGTTGAGCCAAAC |
| U6-F          | CTCGCTTCGGCAGCACA                         |
| U6-R          | AACGCTTCACGAATTTGCGT                      |
| U6-RT         | CGCTTCACGAATTTGCGTGTCAT                   |
| LINC02582-F   | AGCCCAAGGAACATCTCACC                      |
| LINC02582-R   | CACCGATCTCCTCTTCACAAAC                    |
| GAPDH-F       | CGGAGTCAACGGATTTGGTCGTAT                  |
| GAPDH-R       | AGCCTTCTCCATGGTGGTGAAGAC                  |
| CHK1-F        | GGTGAATATAGTGCTGCTATGTTGACA               |
| CHK1-R        | TTGGATAAACAGGGAAGTGAACAC                  |
| USP7-F        | CATCTCTGTCACCTACTCTG                      |
| USP7-R        | ACCTCCTCCTCTCATTCTC                       |
| CTD-2354A18-F | TGGGACCATTCTTTTTTGCAT                     |
| CTD-2354A18-R | GTCCCTCAGGAGGTGACAAA                      |
| RP11-69C17-F  | GGGGGCGGATAATATCACTT                      |
| RP11-69C17-R  | CAGGCATAAGGCAGAACACA                      |
| NR_023390-F   | CATCTCTGTCACCTACTCTG                      |
| NR_023390-R   | ACCTCCTCCTCTCATTCTC                       |
| XLOC_005303-F | CTGATGGTGATGATGATGTC                      |
| XLOC_005303-R | TCCTGAGGTCTTGATATTCC                      |
